# Supplementary material
Source: Research Square preprint supplement (doi:10.21203/rs.3.rs-9739076/v1)
Supplement: Supplementary file 1 [file 25c9d777fc1ea4f481d6520b.docx]

**Supplementary Table 1. Spearman correlations between patient-reported outcome scores and demographics in patients with chronic cough**

| Variables | Spearman’s rho | | |
| --- | --- | --- | --- |
| Cough VAS score | CHQ total score | LCQ total score |
| Age | -0.12* (n=411) | -0.20*** (n=408) | 0.08 (n=405) |
| Body mass index | -0.02 (n=411) | 0.10* (n=408) | 0.02 (n=405) |
| Pre-BD FEV1 (%) | 0.01 (n=347) | -0.03 (n=344) | -0.02 (n=341) |
| FeNO (ppb) | -0.06 (n=371) | -0.01 (n=368) | 0.05 (n=365) |
| Cough VAS score | 1.00 | 0.40***(n=407) | -0.74*** (n=404) |
| CHQ total score | 0.40***(n=407) | 1.00 | -0.53*** (n=403) |

**P*<0.05, ***P*<0.01, ****P*<0.001

VAS, visual analog scale; CHQ, Cough Hypersensitivity Questionnaire; LCQ, Leicester Cough Questionnaire

**Supplementary Table 2. Longitudinal changes in patient-reported outcome scores (PRO) from baseline to 6-month visit by urinary incontinence (UI) group**

**(A)** Generalized estimating equation analysis

| **Variables** | **Cough VAS scorea** | | | **CHQ total scoreb** | | | **LCQ total scorec** | |  |
| --- | --- | --- | --- | --- | --- | --- | --- | --- | --- |
| **ß ± SE** | **95% CI** | ***P*** | **ß ± SE** | **95% CI** | ***P*** | **ß ± SE** | **95% CI** | ***P*** |
| Intercept | 74.00±11.55 | 51.35 to 96.62 | <0.001 | 7.23±2.08 | 3.15 to 11.30 | 0.001 | 14.84±1.31 | 12.27 to 17.40 | <0.001 |
| 2 Time (6-month vs. baseline) | -12.74±6.09 | -24.69 to -0.80 | 0.037 | 0.17±0.68 | -1.16 to 1.50 | 0.80 | 0.95±0.40 | 0.17 to 1.72 | 0.017 |
| Baseline score  Persistent vs. improved UI  Persistent vs. without UI | -4.28±7.32  -2.32±6.40 | -18.63 to 10.07  -14.86 to 10.23 | 0.56  0.72 | 1.65±1.00  -0.16±0.78 | -0.31 to 3.61  -1.70 to 1.38 | 0.10  0.84 | -0.34±0.44  0.23±0.39 | -1.20 to 0.52  -0.55 to 1.00 | 0.44  0.56 |
| 6-month X UI (interaction)  Persistent vs. improved UI  Persistent vs. without UI | -21.76±7.96  -12.32±7.18 | -37.36 to -6.17  -26.40 to 1.76 | 0.006  0.09 | -2.53±0.98  -1.14±0.80 | -4.46 to -0.60  -2.71 to 0.43 | 0.010  0.15 | 2.09±0.65  1.57±0.51 | 0.81 to 3.37  0.57 to 2.57 | 0.001  0.002 |
| Age (yrs) | -0.17±0.10 | -0.36 to 0.03 | 0.09 | -0.06±0.02 | -0.09 to -0.02 | 0.001 | 0.10±0.01 | -0.01 to 0.03 | 0.36 |
| Body mass index (kg/m2) | -0.24±0.33 | -0.88 to 0.40 | 0.47 | 0.08±0.06 | -0.05 to 0.21 | 0.21 | -0.01±0.04 | -0.08 to 0.07 | 0.83 |
| Cough VAS score |  |  |  | 0.07±0.01 | 0.05 to 0.08 | <0.001 | -0.09±0.01 | -0.10 to -0.08 | <0.001 |

an=397, data on 8 patients were missing, bn=393, data on 10 patients were missing, cn=390, data on 11 patients were missing

UI, urinary incontinence; SE, standard error; CI, confidence interval; VAS, visual analog scale; CHQ, Cough Hypersensitivity Questionnaire; LCQ, Leicester Cough Questionnaire

**(B)** Estimated marginal means (EMMs) of patient-reported outcome scores according to UI groups

| **Variables** |  | **Persistent UI** | | | **Improved UI** | | | **Without UI** | | |
| --- | --- | --- | --- | --- | --- | --- | --- | --- | --- | --- |
| **Time** | **EMM±SE** | **95% CI** | ***P*** | **EMM±SE** | **95% CI** | ***P*** | **EMM±SE** | **95% CI** | ***P*** |
| Cough VAS scorea | Baseline | 59.11±5.27 | 48.78-69.44 | <0.001 | 54.83±5.11 | 44.82-64.84 | <0.001 | 56.79±3.60 | 49.75-63.84 | <0.001 |
| 6-month | 46.37±4.17 | 38.19-54.55 | <0.001 | 20.32±1.90 | 16.61-24.04 | <0.001 | 31.73±2.01 | 27.78-35.67 | <0.001 |
| CHQ total scoreb | Baseline | 8.87±0.64 | 7.61-10.13 | <0.001 | 10.52±0.77 | 9.00-12.04 | <0.001 | 8.71±0.45 | 7.83-9.59 | <0.001 |
| 6-month | 9.04±0.62 | 7.82-10.25 | <0.001 | 8.16±0.52 | 7.14-9.17 | <0.001 | 7.74±0.38 | 7.00-8.48 | <0.001 |
| LCQ total scorec | Baseline | 11.27±0.34 | 10.60-11.95 | <0.001 | 10.93±0.34 | 10.27-11.59 | <0.001 | 11.50±0.25 | 11.00-12.00 | <0.001 |
| 6-month | 12.22±0.40 | 11.44-13.00 | <0.001 | 13.97±0.54 | 12.91-15.03 | <0.001 | 14.02±0.34 | 13.36-14.69 | <0.001 |

an=397, data on 8 patients were missing. Adjusted for age and body mass index

bn=393, data on 10 patients were missing. Adjusted for age, body mass index and cough VAS score

cn=390, data on 11 patients were missing. Adjusted for age, body mass index and cough VAS score

UI, urinary incontinence; SE, standard error; CI, confidence interval; VAS, visual analog scale; CHQ, Cough Hypersensitivity Questionnaire; LCQ, Leicester Cough Questionnaire

**Supplementary Figure 1.** Histogram and tertile (T) ranges of cough visual analog scale (VAS) scores at baseline and 6-month follow-up. Baseline T1: 0≤VAS<50, T2: 50 ≤VAS<70, T3: 70≤VAS≤100, Six-month T1: 0≤VAS<20, T2: 20 ≤VAS<40, T3: 40≤VAS≤100


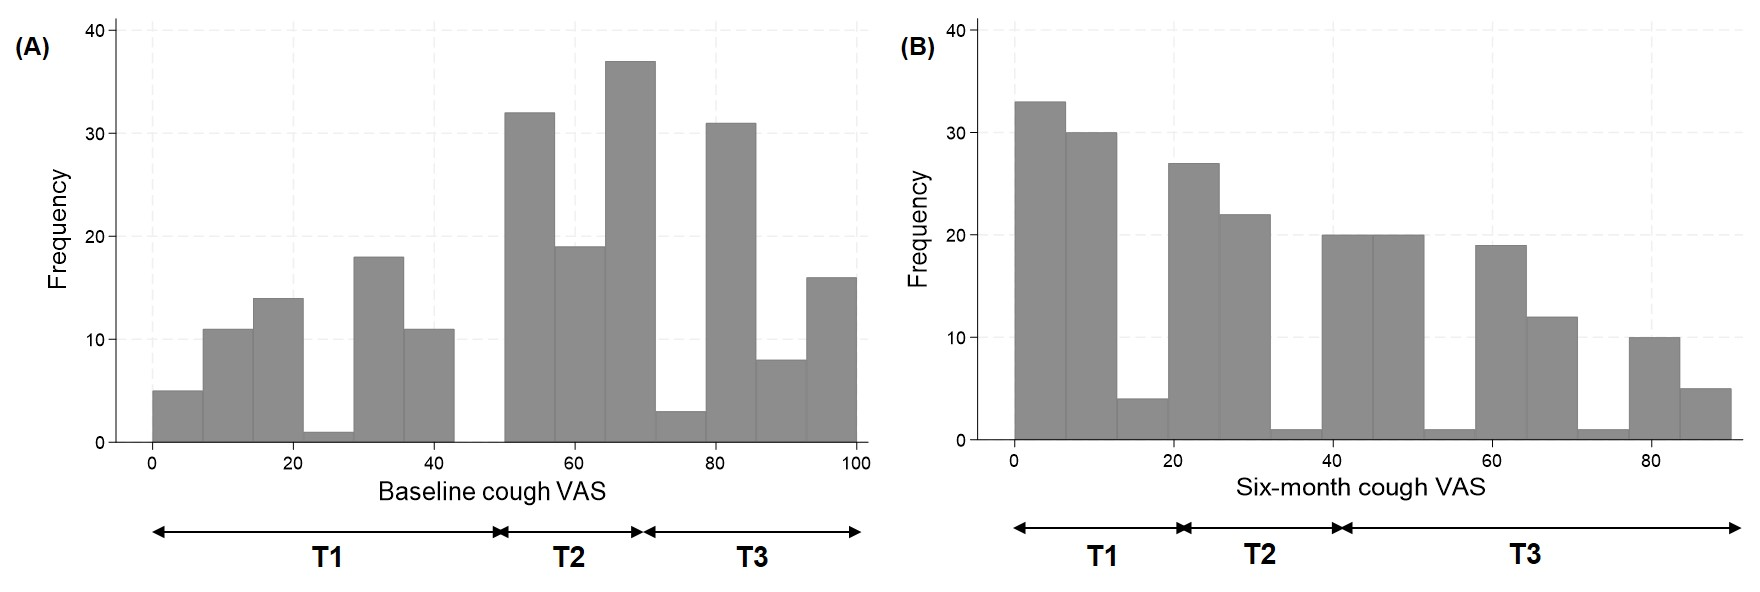


f
