# Supplementary material
Source: Research Square preprint supplement (doi:10.21203/rs.3.rs-9739076/v1)
Supplement: Supplementary file 2 [file 85befdefbd345e073889f086.docx]

**Table 1. Baseline clinical characteristics, patient-reported outcome scores, and laboratory results by urinary incontinence (UI) persistence status**

| **Variables** | **Persistent UI**  **(n= 50)** | **Improved UI**  **(n= 46)** | **Without UI**  **(n=103)** | ***P*** |
| --- | --- | --- | --- | --- |
| Age (yr), mean ± SD | 57.8 ± 11.1 | 57.3 ± 11.2 | 51.6 ± 14.9*† | 0.026 |
| BMI (kg/m2), median (IQR) | 24.8 (22.2-27.4) | 23.3 (21.2-27.3) | 23.0 (20.8-25.2)** | 0.018 |
| Cough durationa, median (IQR) | 72.0 (45.0-121.8) | 90.0 (24.0-168.0) | 75.0 (24.0-180.0) | 0.98 |
| Ever-smoker, n (%) | 3 (6.0) | 3 (6.5) | 14 (13.7) | 0.22 |
| Comorbidities, n (%)  Hypertension  Gastroesophageal reflux  Allergic rhinitis  Asthma | 17 (34.0)  8 (16.3)  7 (14.0)  7 (14.0) | 6 (13.0)  14 (30.4)  11 (23.9)  5 (10.9) | 22 (21.8)  20 (19.8)  12 (11.8)  7 (6.9) | 0.047  0.21  0.16  0.34 |
| Comorbid symptoms, n (%)  Sputum  Rhinorrhea  Wheezing  Dyspnea  Reflux symptoms  Nasal stuffiness  Gastric soreness | 34 (68.0)  19 (38.0)  15 (30.0)  13 (26.0)  11 (22.0)  9 (18.0)  8 (16.0) | 37 (80.4)  22 (48.9)  12 (27.3)  16 (35.6)  7 (15.6)  13 (28.9)  12 (26.1) | 69 (67.0)  41 (39.8)  14 (13.6)  19 (18.4)  20 (19.6)  22 (21.6)  17 (16.7) | 0.23  0.50  0.031  0.08  0.72  0.43  0.34 |
| Number of comorbid symptoms, mean ± SD | 2.5 ± 1.5 | 3.0 ± 2.1 | 2.1 ± 1.5† | 0.046 |
| Complications, n (%)  Headache  Chest pain  Fatigue  Syncope | 20 (40.0)  20 (40.0)  18 (36.0)  1 (2.0) | 28 (60.9)  21 (45.7)  23 (50.0)  0 (0) | 35 (34.0)  32 (31.1)  41 (39.8)  2 (1.9) | 0.008  0.20  0.35  0.63 |
| Number of complications,  mean ± SD | 1.2 ± 1.1 | 1.6 ± 1.1 | 1.1 ± 1.1†† | 0.025 |
| Laboratory tests, median (IQR)  Pre-BD FEV1% predictedb  Pre-BD FVC% predictedb  Pre-BD FEV1/FVC ratiob  FeNO (ppb)c | 92.5 (81.0-101.3)  90.5 (79.8-9.5)  79.0 (7.0-83.0)  18.5 (11.3-37.5) | 91.5 (86.8-101.3)  90.5 (83.8-103.3)  81.0 (76.8-83.3)  20.0 (14.0-34.0) | 90.5 (81.8-98.3)  89.0 (81.8-97.3)  80.0 (76.0-86.0)  17.0 (11.5-25.5) | 0.41  0.39  0.45  0.29 |
| Baseline cough VAS, median (IQR) | 60.0 (37.5-80.0) | 52.5 (30.0-80.0) | 60.0 (50.0-71.0) | 0.84 |
| Baseline CHQ scores, median (IQR)d  Cough-related laryngeal sensation  Cough triggers  Total | 4.0 (2.0-5.0)  5.0 (3.0-8.0)  9.0 (6.0-13.0) | 4.0 (2.8-5.0)  7.0 (4.0-8.3)  11.0 (7.8-13.0) | 4.0 (3.0-5.0)  5.5 (3.0-8.0)  9.0 (7.0-13.0) | 0.88  0.33  0.46 |
| Baseline LCQ scores, median (IQR)  Physical  Psychological  Social  Total | 4.1 (3.3-4.6)  2.8 (2.1-4.0)  3.1 (2.0-4.0)  9.9 (8.2-12.8) | 3.8 (3.0-4.5)  2.9 (2.0-3.7)  3.0 (2.3-4.1)  9.7 (7.9-11.7) | 4.0 (3.2-4.9)  2.8 (2.1-4.0)  3.0 (2.2-4.5)  9.6 (7.9-13.0) | 0.19  0.86  0.95  0.80 |

an=34/38/66, bn=43/38/86, cn=44/43/93, dn=50/46/102

SD, standard deviation; IQR, interquartile range; BD, bronchodilator; FEV1, forced expiratory volume in 1 second; FVC, Forced vital capacity; FeNO, fractional exhaled nitric oxide; VAS, visual analog scale; CHQ, Cough Hypersensitivity Questionnaire; LCQ, Leicester Cough Questionnaire

**P*<0.05 compared to persistent UI group, †*P*<0.05 and ††*P*<0.01 compared to improved UI group

**Table 2. Logistic regression analysis of the association between baseline variables and persistent or improved urinary incontinence (UI) in patients with chronic cough**

| **Variables** | **Persistent vs. without UIa** | | **Persistent vs. improved UIb** | | **Improved vs. without UIc** | |
| --- | --- | --- | --- | --- | --- | --- |
| **OR (95% CI)** | ***P*** | **OR (95% CI)** | ***P*** | **OR (95% CI)** | ***P*** |
| Age ≥ 60 (years) | 1.89 (0.81-4.39) | 0.14 | 0.87 (0.33-2.28) | 0.77 | 2.64 (1.08-6.45) | 0.033 |
| BMI ≥ 25 (kg/m2) | 2.34 (1.08-5.08) | 0.032 | 1.52 (0.56-4.16) | 0.41 | 1.65 (0.70-3.89) | 0.26 |
| Hypertension (Yes vs. No) | 1.43 (0.57-3.62) | 0.45 | 3.06 (0.88-10.63) | 0.08 | 0.36 (0.10-1.24) | 0.11 |
| Headache (Yes vs. No) | 1.15 (0.48-2.76) | 0.75 | 0.35 (0.13-0.95) | 0.039 | 2.25 (0.94-5.40) | 0.07 |
| Wheezing (Yes vs. No) | 3.42 (1.33-8.78) | 0.011 | 1.65 (0.55-4.89) | 0.37 | 1.84 (0.66-5.14) | 0.25 |
| Baseline cough VAS T  T3 vs. T1  T2 vs. T1 | 0.59 (0.22-1.57)  0.30 (0.10-0.88) | 0.29  0.029 | 1.68 (0.56-5.07)  0.97 (0.26-3.66) | 0.36  0.96 | 0.39 (0.14-1.07)  0.31 (0.10-0.94) | 0.07  0.038 |
| Baseline CHQ total score ≥10 | 0.90 (0.41-1.98) | 0.79 | 0.75 (0.30-1.85) | 0.53 | 1.17 (0.51-2.69) | 0.70 |
| Baseline LCQ total score <13 | 1.43 (0.53-3.89) | 0.48 | 0.58 (0.17-1.97) | 0.38 | 2.73 (0.84-8.84) | 0.09 |

an=149 (72.3%), Hosmer & Lemeshow *P*=0.459, bn=94 (45.6%), Hosmer & Lemeshow *P*=0.313, cn=143 (69.4%), Hosmer & Lemeshow *P*=0.398

UI, urinary incontinence; OR, odds ratio; CI, confidence interval; BMI, body mass index; VAS, visual analog scale; T, tertile; CHQ, Cough Hypersensitivity Questionnaire; LCQ, Leicester Cough Questionnaire

Baseline cough VAS T1: 0≤VAS<50, T2: 50 ≤VAS<70, T3: 70≤VAS≤100

**Table 3. Treatment responses and medication prescriptions at 6-month follow-up by patient group**

| **Variables** | **Persistent UI**  **(n= 50)** | **Improved UI**  **(n= 46)** | **Without UI**  **(n=103)** | ***P*** |
| --- | --- | --- | --- | --- |
| **Treatment responder**  ΔLCQ ≥ 1.3, n (%)a  6-month cough VAS <20b, n (%) | 28 (58.3)  11 (22.4) | 40 (87.0)  29 (63.0) | 74 (76.3)  26 (25.2) | 0.005  <0.001 |
| **Patient-report outcome scores**  6-month cough VAS, median (IQR)b  6-month total CHQ, median (IQR)c  6-month total LCQ, median (IQR)a | 50.0 (20.0-65.0)  9.0 (4.5-12.0)  13.0 (9.5-15.6) | 10.0 (3.8-32.5)**  6.0 (3.0-10.0)*  17.6 (13.7-19.1)** | 30.0 (10.0-50.0)*†  7.0 (4.0-10.0)*  15.7 (12.2-17.7)**† | <0.001  0.024  <0.001 |
| **Medication prescription, n (%)**  H1 antihistamined  Codeinee  Leukotriene receptor antagonistf  Inhaled corticosteroidg  Proton pump inhibitorh  Neuromodulatorg  Macrolideg  Oral corticosteroidg | 23 (52.3)  21 (46.7)  18 (40.0)  15 (34.1)  11 (25.0)  10 (22.7)  4 (9.1)  3 (6.8) | 13 (31.0)  21 (47.7)  14 (33.3)  15 (35.7)  6 (14.6)  3 (7.1)  2 (4.8)  3 (7.1) | 37 (38.9)  33 (35.1)  32 (34.4)  31 (33.0)  14 (14.9)  9 (9.6)  8 (8.5)  7 (7.4) | 0.12  0.25  0.77  0.95  0.30  0.046  0.70  0.99 |
| **Cough diagnosis, n (%)i**  Specific cough  Unspecified or refractory cough  Spontaneously resolved | 12 (30.8)  27 (69.2)  0 (0) | 17 (42.5)  22 (55.0)  1 (2.5) | 33 (36.9)  49 (56.3)  5 (5.7) | 0.37 |

an=48/46/99, bn=49/46/103, cn=49/46/101, dn=44/42/95, en=45/44/94, fn=45/42/93, gn=44/42/94, hn=44/41/94, in=39/40/87

UI, urinary incontinence; VAS, visual analog scale; LCQ, Leicester Cough Questionnaire; IQR, interquartile range

**P*<0.05, ***P*<0.001 compared to persistent UI group, †*P*<0.05 compared to improved UI group
